# Supplementary material
Source: MDPI journal article supplement (https://www.mdpi.com/2073-4395/11/12/2577)
Supplement: s1 [file s1]

**Table S1.** Factor loading matrix of the four principal components.

| Treatment Time | Principal Components | Positive Scoring Coefficients                                                                                                        | Negative Scoring Coefficients                                        |
|----------------|----------------------|--------------------------------------------------------------------------------------------------------------------------------------|----------------------------------------------------------------------|
| Day 1          | PC1<br>(40.71%)      | F440/F520 (0.475) F440/F690 (0.416)<br>F440/F740 (0.315) F440 (0.273)                                                                | F690/F740 (−0.409) F520 (−0.313)<br>F520/F740 (−0.312) F690 (−0.232) |
|                | PC2<br>(31.77%)      | F740 (0.487) F690 (0.422)                                                                                                            | F690/F740 (−0.484)                                                   |
|                | PC3<br>(21.50%)      | F440 (0.531) F520 (0.524)<br>F740 (0.323) F520/F690 (0.316)<br>F690 (0.287) F440/F740 (0.246)<br>F440/F690 (0.226) F520/F740 (0.202) | —                                                                    |
|                | PC4<br>(5.78%)       | F690/F740 (0.682) F440/F740 (0.420)<br>F440/F520 (0.266) F690 (0.242)                                                                | F520/F690 (−0.378)                                                   |
| Day 3          | PC1<br>(49.66%)      | F440/F690 (0.435) F440/F740 (0.418)<br>F440/F520 (0.328) F520/F690 (0.280)<br>F440 (0.213)                                           | F690 (−0.407) F740 (−0.362)<br>F520 (−0.237)                         |
|                | PC2<br>(22.52%)      | F520/F740 (0.602) F520 (0.455)<br>F520/F690 (0.411) F690/F740 (0.260)                                                                | F440/F520(−0.403)                                                    |
|                | PC3<br>(15.14%)      | F440 (0.520) F740 (0.445)<br>F520 (0.397) F520/F690 (0.255)                                                                          | F690/F740(−0.498)                                                    |
|                | PC4<br>(12.45%)      | F690/F740 (0.557) F440 (0.536)<br>F690 (0.345) F440/F740 (0.291)<br>F440/F520 (0.280)                                                | F520/F690 (−0.322)                                                   |
| Day 5          | PC1<br>(66.28%)      | F520/F690 (0.384) F520/F740 (0.372)<br>F440/F690 (0.371) F440/F740 (0.345)<br>F520 (0.318) F440 (0.205)                              | F690 (−0.352) F740 (−0.292)<br>F440/F520 (−0.240) F690/F740 (−0.219) |
|                | PC2<br>(12.68%)      | F740 (0.563) F440 (0.527)<br>F520 (0.296)                                                                                            | F690/F740 (−0.484)                                                   |
|                | PC3<br>(11.66%)      | F440/F520 (0.678) F440 (0.496)<br>F440/F740 (0.370) F690/F740 (0.218)                                                                | F520 (−0.203)                                                        |
|                | PC4<br>(9.03%)       | F690/F740 (0.603) F520 (0.429)<br>F690 (0.402) F440 (0.299)<br>F520/F740 (0.226)                                                     | F440/F520 (−0.292) F440/F690 (−0.210)                                |
| Day 7          | PC1<br>(69.15%)      | F520/F690 (0.376) F440/F690 (0.366)<br>F520/F740 (0.365) F440/F740 (0.347)<br>F520 (0.325) F440 (0.262)                              | F690(−0.343) F740 (−0.285)<br>F440/F520 (−0.227) F690/F740 (−0.216)  |
|                | PC2<br>(11.85%)      | F740 (0.600) F520 (0.300)<br>F440 (0.276)                                                                                            | F690/F740 (−0.567) F440/F740 (−0.273)                                |

|       |                 |                                                                                                         |                                                        |
|-------|-----------------|---------------------------------------------------------------------------------------------------------|--------------------------------------------------------|
| Day 9 | PC3<br>(10.21%) | F440/F520 (0.764) F440 (0.460)<br>F440/F690 (0.234) F440/F740 (0.213)                                   | F520 (−0.202)                                          |
|       | PC4<br>(8.45%)  | F690/F740 (0.561) F440 (0.505)<br>F690 (0.438) F520 (0.373)                                             | ---                                                    |
|       | PC1<br>(71.03%) | F440/F690 (0.371) F520/F690 (0.364)<br>F440/F740 (0.363) F520/F740 (0.346)<br>F440 (0.335) F520 (0.285) | F690(−0.343) F740 (−0.277)<br>F690/F740 (−0.228)       |
|       | PC2<br>(11.24%) | F740 (0.548) F520 (0.448)                                                                               | F690/F740 (−0.512) F440/F520 (−0.386)                  |
|       | PC3<br>(10.40%) | F440/F520 (0.672) F740 (0.253)                                                                          | F690/F740 (−0.445) F520/F740 (−0.370)<br>F520 (−0.310) |
|       | PC4<br>(7.01%)  | F440 (0.480) F690 (0.455)<br>F690/F740 (0.433) F520 (0.368)<br>F440/F520 (0.344) F740 (0.257)           | ---                                                    |

Note: Only loadings  $\geq 0.2$  were selected.
